# Supplementary material for: A DFT study of Pt layer deposition on catalyst supports of titanium oxide, nitride and carbide
Source: Royal Society of Chemistry journal article supplement (doi:10.1039/c5ta05904f), 2015-01-01
Supplement: c5ta05904f1.pdf [file c5ta05904f1.pdf]

## Supplementary Information

### DFT Modelling Study of Pt Layer on Catalyst supports of Titanium Oxide, Nitride and Carbide

#### W11S17: Computational Screening of Supported Metal Films

Xin Xia,<sup>a\*</sup>

*a North China Electric Power University,  
No.2 Beinong Road, Beijing, China 102206*

Glenn Jones,<sup>b</sup>

*b Johnson Matthey Technology Centre, Pretoria*

Misbah Sarwar,<sup>c</sup> Qian Tang,<sup>c</sup> Ian Harkness,<sup>c</sup> David Thompsett<sup>c</sup>

*c Johnson Matthey Technology Centre,  
Blounts Court, Reading, Berkshire, UK RG4 9NH*

#### 1. The models of MO<sub>2</sub> support:

The bulk structures of rutile MO<sub>2</sub> (M= Ti, Ru, Ir) were optimized based on the literature lattice parameters [27-32]. Relaxations were performed using 1x1x2 supercells with constant volume and unconstraint volume to achieve the equilibrium lattice structure. The DFT calculation results in **Table S1** suggest employing the RPBE functional could expand the lattice parameter by 2% compared to the experimental values. However, the c/a ratios remain in a reasonable agreement with experimental results. A significant lattice/bond relaxation can be observed for the calculations of bulk structures using RPBE functional which is developed to correct the overbinding effect of DFT for chemisorption study. [43] Other than the exchange-correlation functionals, the supercell size also has a noticeable influence on the structure relaxation. The RPBE calculations show TiO<sub>2</sub> to be an insulator and RuO<sub>2</sub> and IrO<sub>2</sub> to be conductive. The calculated band gap of R-TiO<sub>2</sub> (2.01eV) is about 30% below the experimental value of 3.06 eV. This is a well-known limitation of DFT, which underestimates band gaps due to the insufficient cancellation of the self-interaction

correction inherent in the local exchange functional schemes. By using a Hubbard corrected DFT+U functional ( $U=6\text{eV}$ ), the band gap of rutile  $\text{TiO}_2$  can correctly predicted, however, this  $U$  value is not transformable for the study of other oxide structures.

**Table S1** Calculation results of rutile structure  $\text{MO}_2$  ( $M= \text{Ti, Ru, Ir}$ )

| Rutile Structure       | Methods                  | a(Å)                     | c/a                      | u                        |
|------------------------|--------------------------|--------------------------|--------------------------|--------------------------|
| <b>TiO<sub>2</sub></b> | RPBE                     | 4.701                    | 0.634                    | 0.306                    |
|                        | PBE <sup>[33]</sup>      | 4.639 <sup>a</sup>       | 0.64 <sup>a</sup>        | 0.305 <sup>a</sup>       |
|                        | PW91                     | 4.652                    | 0.638                    | 0.304                    |
|                        | LDA <sup>[33]</sup>      | 4.563 <sup>a</sup> 4.564 | 0.644 <sup>a</sup> 0.642 | 0.304 <sup>a</sup> 0.304 |
|                        | Exp. <sup>[27-29]</sup>  | 4.594                    | 0.644                    | 0.305                    |
| <b>RuO<sub>2</sub></b> | RPBE                     | 4.561                    | 0.680                    | 0.305                    |
|                        | PBE <sup>[33]</sup>      | 4.534 <sup>c</sup>       | 0.683 <sup>c</sup>       | 0.305 <sup>c</sup>       |
|                        | PW91                     | 4.526                    | 0.688                    | 0.305                    |
|                        | LDA <sup>[33]</sup>      | 4.440 <sup>c</sup>       | 0.693 <sup>c</sup>       | 0.306 <sup>c</sup>       |
|                        | Exp. <sup>[30][31]</sup> | 4.498 <sup>d</sup>       | 0.69 <sup>d</sup>        | 0.305 <sup>d</sup>       |
| <b>IrO<sub>2</sub></b> | RPBE                     | 4.680                    | 0.695                    | 0.308                    |
|                        | GGA                      | 4.543                    | 0.694                    | 0.307                    |
|                        | LDA                      | 4.492                    | 0.692                    | 0.308                    |
|                        | Exp. <sup>[31][32]</sup> | 4.505                    | 0.701                    | 0.308                    |

The surface stability of rutile  $\text{MO}_2$  ( $M= \text{Ti, Ru, Ir}$ ) has been studied. The low index surfaces (110), (100) and (001) have been modelled using the slab model. The calculation results suggest that the oxygen terminated (110) surfaces are the most stable, as indicated by the lower energies.

The R- $\text{TiO}_2$  (110) surface is modelled using periodic slabs consisting of several repeat units built of the  $\text{O-Ti}_2\text{O}_2\text{-O}$  trilayers, separated by a vacuum gap of 25 Å. Each repeat unit is charge neutral and has a zero dipole moment in the direction normal to the surface. The oxygen terminated surfaces are calculated to be energetically favourable. The surface energy convergence with respect to the thickness of the slab model has been tested for  $\text{TiO}_2$  (110), which shows an oscillating value of surface energy. This is considered to be due to the effect of the nonequivalence of the relaxed odd and even layer slabs. To overcome the difficulty of the energy oscillating with the thickness of surface slab, Harris and Quong<sup>[44][45]</sup> suggest a 25% rule which allows

one to estimate the asymptotic surface energy from the average shift. According to their previous work, the converged energy values lie at 25% of the way between the three- and four-layer values. In this study, the surface energies of 3 and 4 trilayer surface slabs are calculated to be 0.84 and 0.58 J/m<sup>2</sup>, respectively. The result of the 4 trilayer slab is in accordance with the experimental value of 0.58 J/m<sup>2</sup>. Therefore, we decide to use the surface slab of 4 trilayer thickness for MO<sub>2</sub> (110) in subsequent study.

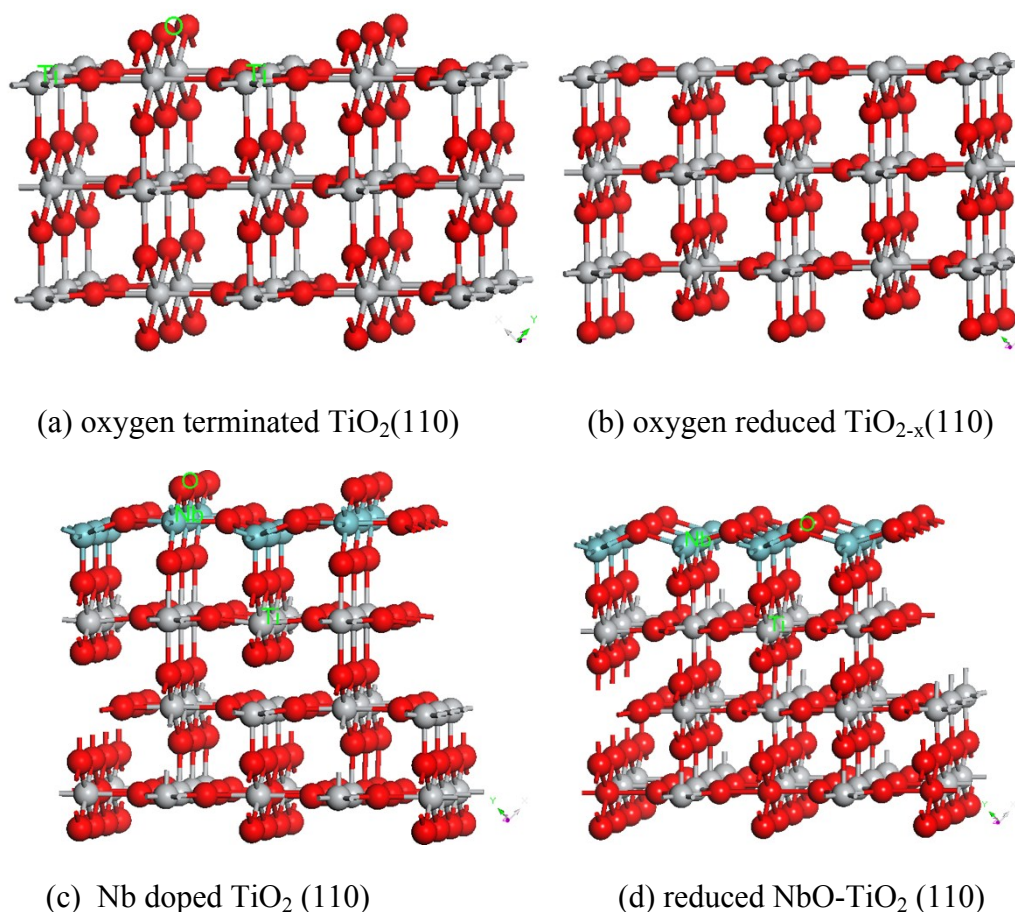

**Figure S1.** Surface structure models of (a) oxygen terminated TiO<sub>2</sub> (110), (b) oxygen reduced TiO<sub>2-x</sub> (110), (c) Nb doped TiO<sub>2</sub> (110) and (d) reduced NbO-TiO<sub>2</sub> (110) surface. (O in red; Ti in grey; Nb in light blue)

In order to understand the effect of different cleavage surface planes on Pt wetting, the TiO<sub>2</sub> (100) was modelled to compare with TiO<sub>2</sub> (110). Based on the rutile TiO<sub>2</sub> (110) structure, an oxygen reduced form of TiO<sub>2-x</sub>(110)<sup>[12-15]</sup> surface was also created as well as a Nb-doped TiO<sub>2</sub>(110) surface. It is suggested in the literature that Nb segregates to the surface of TiO<sub>2</sub> to form an NbO<sub>x</sub> tie layer. <sup>[16]</sup> In our study, the reduced niobium oxides, both NbO<sub>2</sub> and NbO were considered and compared as the

tie layer (an interface between Pt and substrate support.) These models of rutile  $\text{TiO}_2$  (110) related structures are shown in **Figure S1**.

The perovskite structure  $\text{SrTiO}_3$  is also of interest since it can be viewed as an intercalated structure of six folded  $\text{TiO}_3$  octahedral with Sr at the interstitial sites. The most stable surface of  $\text{SrTiO}_3$  (100) and its possible surface terminations have been investigated by the modelling study. Both Sr-O and TiO terminated surfaces were considered.

The anatase  $\text{TiO}_2$  structure have been modelled to compare with the rutile structure. The low index surface of A- $\text{TiO}_2(001)$ , which contains fivefold  $\text{Ti}_{5c}$  as in the reduced R- $\text{TiO}_2(110)$  has been chosen for the Pt deposition study. The (001) surface of anatase titania is also the surface most often considered for catalytic applications. <sup>[46]</sup>

## 2. The calculation of segregation energy

An example of the Pt overlayer and underlayer model on rutile  $\text{TiO}_2$  (110) has been illustrated in **Figure S2**. When moving the Pt overlayer to the underlayer, the entire  $\text{TiO}_2$  trilayer is lifted up to accommodate the Pt atoms resulting in an energy increase of 0.9eV. Both of the full ML coverage structures I and II are much more stable than the over+underlayer model. Moving  $\frac{1}{2}$  ML Pt in the overlayer structure to the subsurface interstitial site of  $\text{TiO}_2$  (110) (i.e. structure III) requires an energy cost of 4.1eV. Therefore, the Pt skin is energetically favourable on the  $\text{TiO}_2$  (110) support.

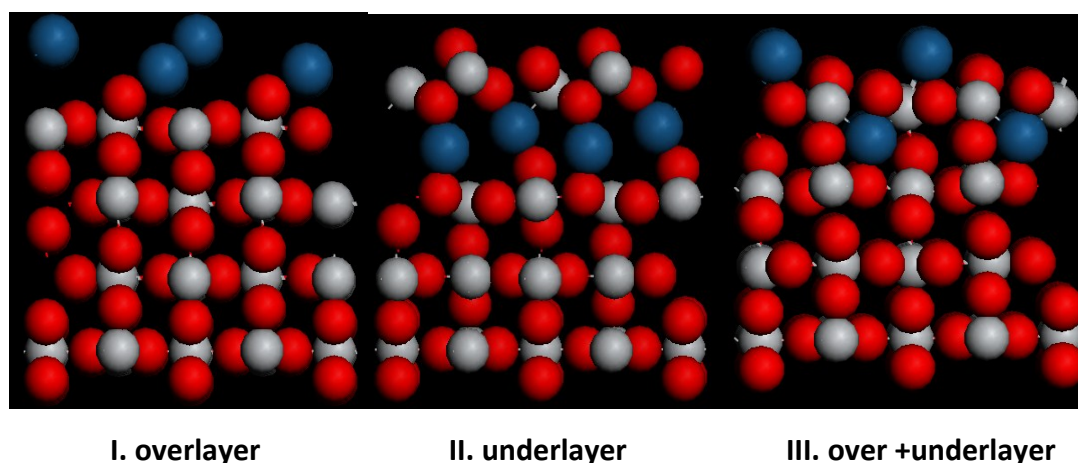

**Figure S2.** The Pt overlayer (I), underlayer (II) and mixed surface (over and underlayer) (III) on the support of rutile (110) oxides. (Pt in blue; Ti in grey; oxygen in red)

### 3. Pt stacking order on TiO<sub>2</sub> (110) and (100)

The stacking order for Pt deposition was modelled by adding Pt atom by atom on a surface unit of support structure. Due to the diversified geometry of support surfaces, the number of Pt atoms consists an overlayer plane are different. However, the stacking order study of Pt atoms were still limited by a relatively small surface cell. In order to check the relaxation effect of the Pt films, the obtained structure of 1ML Pt above the substrate surface have been tested by enlarging the surface unit to a supercell, e.g. 2x1 in the case of TiO<sub>2</sub>(110) substrate, and 2x2 for TiO<sub>2</sub>(001). The results suggest the stacking order of Pt overlayers remain the same, and the formation energy only has been reduced slightly.

**Figure S3.** Adding Pt atoms above R-TiO<sub>2</sub> (110) surface. n is the number of Pt atoms on a substrate surface unit. Considering the geometry of R-TiO<sub>2</sub> (110), three Pt atoms consist an Pt overlayer plane, i.e. n=3 N.

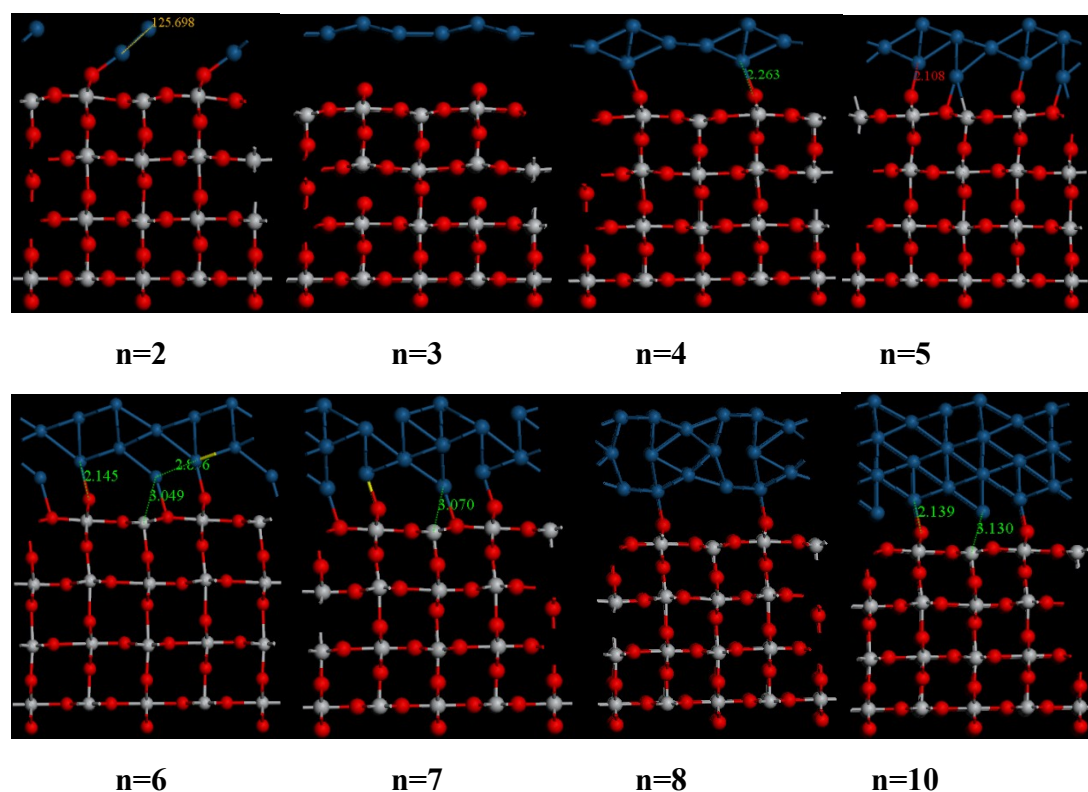

**Table S2.** Adding Pt atoms above TiO<sub>2</sub> (110) surface.

| TiO <sub>2</sub> (110) | n=1    | 2      | 3      | 4      | 5      | 6      | 7      | 8            | 9      | 10     |
|------------------------|--------|--------|--------|--------|--------|--------|--------|--------------|--------|--------|
| E <sub>coh</sub> eV    | -22.36 | -20.63 | -19.29 | -18.14 | -17.14 | -16.29 | -15.55 | -14.95       | -14.40 | -13.91 |
| d(Pt-O) Å              | 2.09   | 2.21   | 4.22   | 2.26   | 2.11   | 2.15   | 2.15   | 2.10<br>2.25 | 2.16   | 2.14   |
| d(Pt-Ti) Å             | 2.79   | 2.97   | 5.21   | 3.70   | 2.96   | 3.05   | 3.07   | 2.92         | 3.13   | 3.13   |

As shown in **Figure S3**, the bridging oxygen on the TiO<sub>2</sub> (110) surface is the active site to adsorb the 1<sup>st</sup> Pt atom. The 2<sup>nd</sup> Pt tends to bond with the 1<sup>st</sup> Pt rather than the lower surface sites oxygen or Ti. The 3<sup>rd</sup> and 4<sup>th</sup> Pt atoms stack on top of the surface oxygen. Starting from the 5<sup>th</sup> Pt, the close packed (211) surface of Pt has been formed. This stacking order would hold for more than 6 Pt atoms or 3 atomic layer of Pt deposition. However, the Pt-Pt bonds along the surface direction have been stretched by  $\approx 0.2$  Å. This is thought to be due to the fact that the surface area of the Pt (211) is slightly smaller than that of TiO<sub>2</sub> (110).

**Figure S4.** Adding Pt atoms above TiO<sub>2</sub> (110) surface. n is the number of Pt atoms on a substrate surface unit. On the R-TiO<sub>2</sub> (001) substrate, four Pt atoms consist an Pt overlayer plane, i.e. n=4N.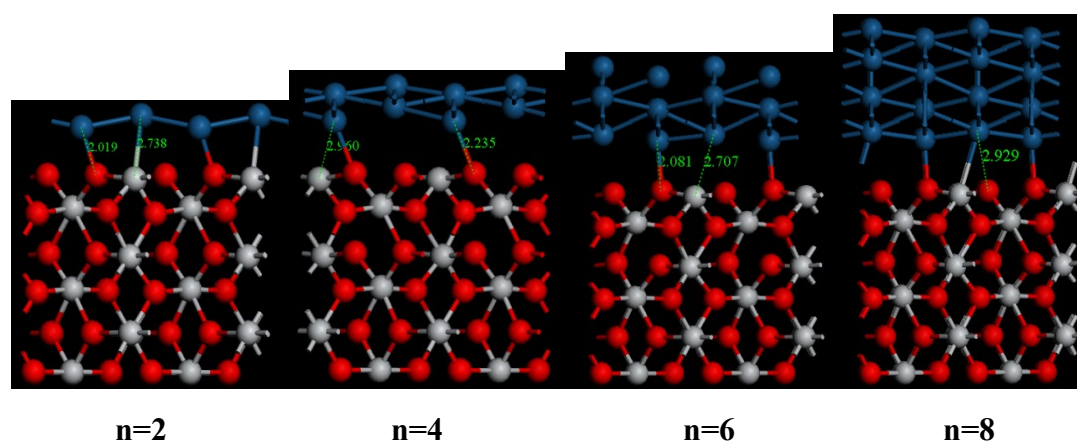**Table S3.** Adding Pt atoms above TiO<sub>2</sub> (001) surface.

| TiO <sub>2</sub> (001) | Pt=2   | 4      | 6      | 8      | 10     |
|------------------------|--------|--------|--------|--------|--------|
| Ecoh eV                | -19.14 | -16.40 | -14.55 | -13.26 | -12.31 |
| d(Pt-O) Å              | 2.01   | 2.24   | 2.08   | 2.08   | 2.11   |
| d(Pt-Ti) Å             | 2.73   | 2.96   | 2.70   | 2.76   | 2.93   |

A distorted Pt(111) surface has been found for Pt deposition above the TiO<sub>2</sub> (001) substrate. Half of the Pt(111) layer is lifted up by the surface Ti atoms since the Ti-Pt bond is longer than the Pt-O bond.

The energetics of Pt deposition on the TiO<sub>2</sub> surfaces are summarised in **Figure S5**

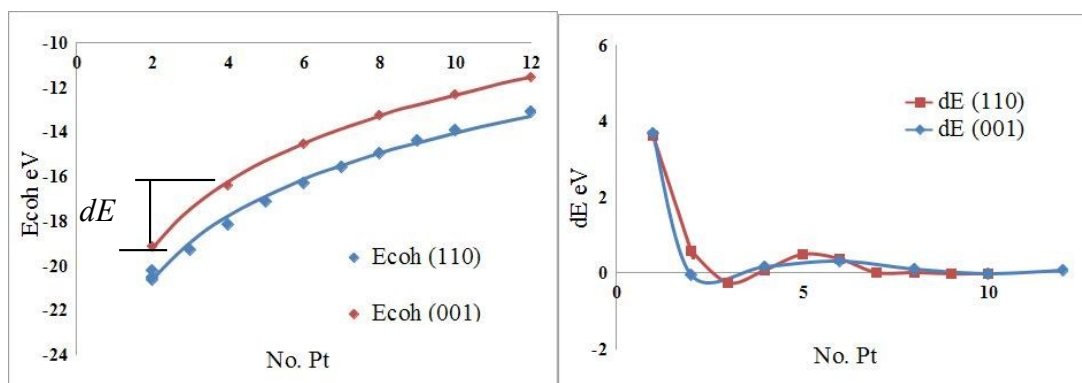

**Figure S5** Pt growth on the support surfaces of TiO<sub>2</sub> (110) and (001). Left: The cohesive energy of Pt-TiO<sub>2</sub> system as a function of the number of Pt. Right: the binding energy increment, i.e. the energy requires for each Pt layer adding as a function of number of Pt atoms.

#### 4. The DOS analysis of Pt atoms on TiO<sub>2</sub> (110) surface

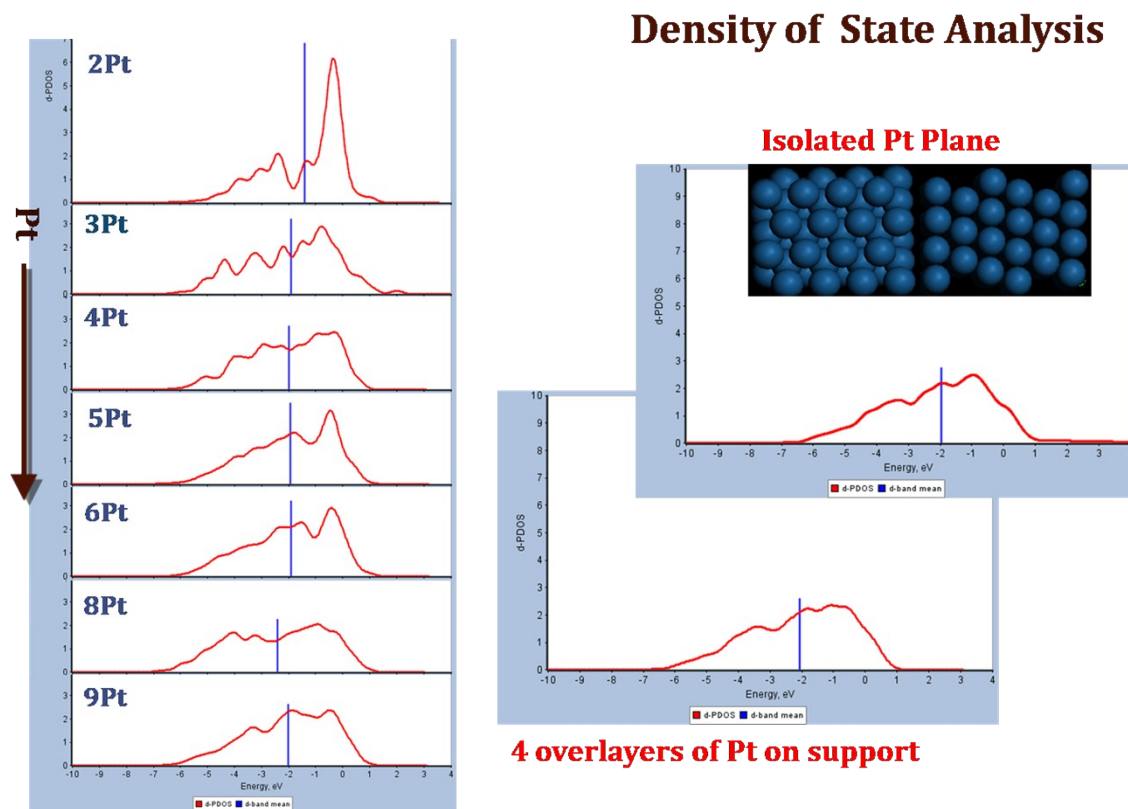

Figure S6 the density of state of Pt overlayer on TiO<sub>2</sub> (110) support.



## 5. Charge Analysis of TiX<sub>n</sub> supports

**Table S2** Pt-support TiX<sub>n</sub> interfacial bond formation and Mulliken charge transfer. (Pt<sup>Ti</sup> denotes the Pt atoms which forms bond with the Ti cations on the support surface. Pt<sup>X</sup> denotes the Pt atoms bonding with surface anion X(X=O, N, C))

| Supports<br>TiX                           | d(Pt-Ti) Å | d(Pt-O/N,C)<br>Å | Charge e<br>Ti→Pt <sup>Ti</sup> | Charge e<br>X→Pt <sup>X</sup> | E <sub>bind</sub> [1 <sup>st</sup> Pt]<br>eV |
|-------------------------------------------|------------|------------------|---------------------------------|-------------------------------|----------------------------------------------|
| A-TiO <sub>2</sub> (001)                  | 2.49       | 1.97             | -0.22                           | 0.16<br><b>(Pt→O)</b>         | 2.92                                         |
| R-TiO <sub>2</sub> (110)                  | 2.97       | 2.21             | -0.06                           | 0.01                          | 3.63                                         |
| R-Ti <sub>n</sub> O <sub>2n-2</sub> (110) | 2.71       | 2.83             | -0.40                           | 0.21                          | -0.12                                        |
| TiO(100)                                  | 2.62       |                  | -0.47                           | 0.05                          | <u>-1.42</u>                                 |
| TiN(100)                                  | 3.44       | 2.39             | -0.17                           | 0.08                          | 0.66                                         |
| TiC(100)                                  | 2.93       | 2.01             | 0.09                            | -0.16<br><b>(C→Pt)</b>        | 0.26                                         |
